# Supplementary material
Source: MDPI journal article supplement (https://www.mdpi.com/2571-841X/5/2/20)
Supplement: s1 [file s1]

# Supplementary Materials

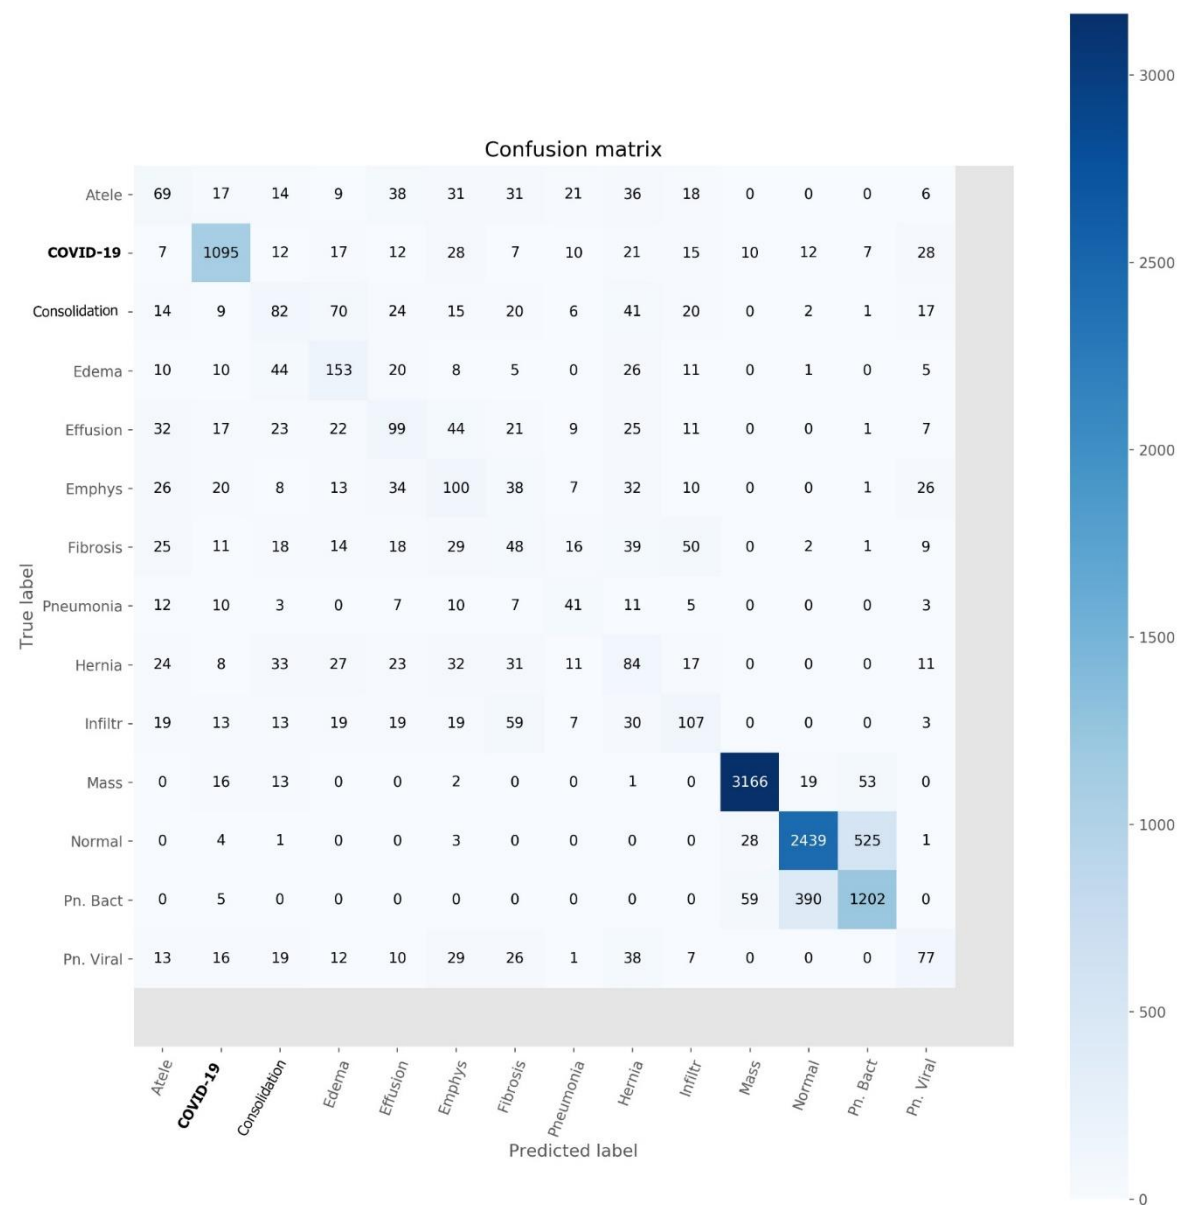

Figure S1. Confusion Matrix for the Multiclass dataset.

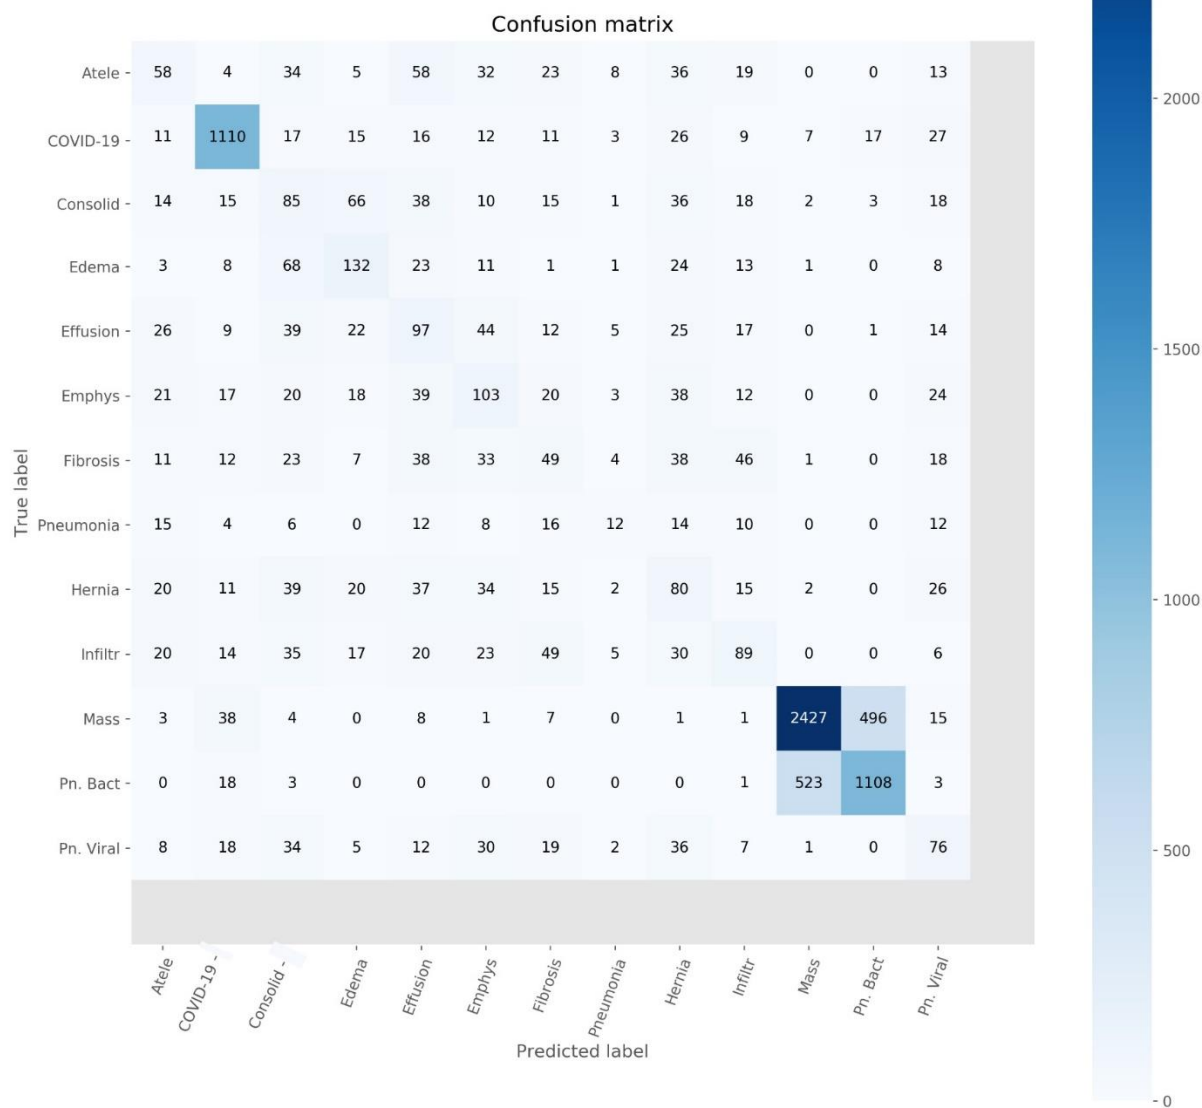

**Figure S2.** Confusion Matrix for the Abnormality discrimination dataset.

# MobileNet (v2) Parameters and Python implementation

## 1. Parameters

Table S1. MobileNet (v2) parameters and hyper-parameters.

|                                            |                                                                                               |
|--------------------------------------------|-----------------------------------------------------------------------------------------------|
| <b>Version</b>                             | 2                                                                                             |
| <b>Input Shape (height,width,channels)</b> | 400x400x1                                                                                     |
| <b>Last Convolution path output name</b>   | 'conv_pw_13_relu'                                                                             |
| <b>Global Pooling</b>                      | Global Average Pooling after the last activation                                              |
| <b>Classification network</b>              | One densely connected layer (2500 nodes) and one layer of two nodes for binary classification |
| <b>Loss Function</b>                       | Categorical Cross-Entropy                                                                     |
| <b>Optimizer</b>                           | Adam with the default parameters of tf.keras.optimizers                                       |
| <b>Extra Batch Normalization layers</b>    | Yes, inside the densely connected layer at the top of the network                             |
| <b>Dropout layer</b>                       | Yes, 50% dropout inside the densely connected layer at the top of the network                 |
| <b>Epochs</b>                              | 40                                                                                            |
| <b>Batch Size</b>                          | 32                                                                                            |

## 2. Python code

Python version: 3.8

Tensorflow version: 2.0

```
def make_mobile (in_shape, tune, classes):

    base_model = tf.keras.applications.MobileNet(
        include_top=False,
        weights="imagenet",
        input_tensor=None,
        input_shape=in_shape,
        pooling=None,
        classes=classes)

    layer_dict = dict([(layer.name, layer) for layer in base_model.layers])

    for layer in base_model.layers:
        layer.trainable = True #or False, depending on the experiment

    x1 = layer_dict['conv_pw_13_relu'].output
    x1= tf.keras.layers.GlobalAveragePooling2D()(x1)
```

```
x = tf.keras.layers.Dense(2500, activation='relu')(x1)
x = tf.keras.layers.BatchNormalization()(x)
x = tf.keras.layers.Dropout(0.5)(x)
x = tf.keras.layers.Dense(classes, activation='softmax')(x)
model = tf.keras.Model(inputs=base_model.input, outputs=x)

model.summary()
model.compile(optimizer='adam' loss='categorical_crossentropy',
metrics=['accuracy'])
plot_model(model, to_file='mobile.png')
print("[INFO] Model Compiled!")
return model
```
